# Supplementary material for: Metformin Enhances Antibody-Mediated Recognition of HIV-Infected CD4+ T-Cells by Decreasing Viral Release
Source: PubMed Central journal article supplement — bioRxiv. 2024 Feb 19:2024.02.15.580166. Preprint. [Version 1] doi: 10.1101/2024.02.15.580166 (PMC10925111; doi:10.1101/2024.02.15.580166), 2024-02-19

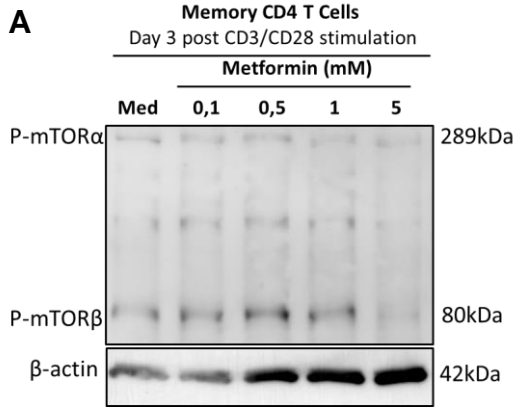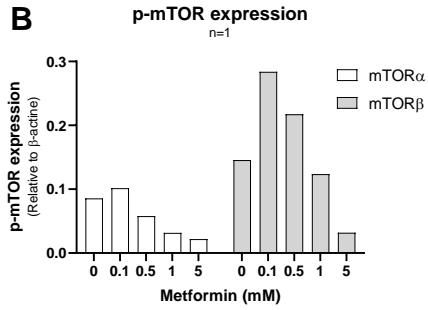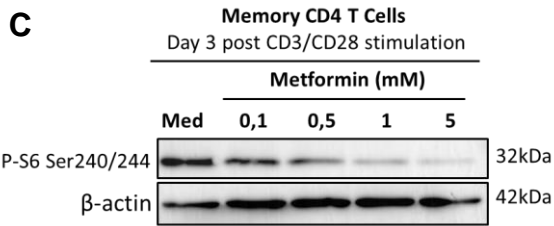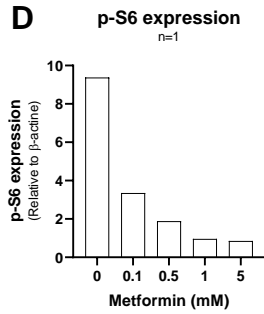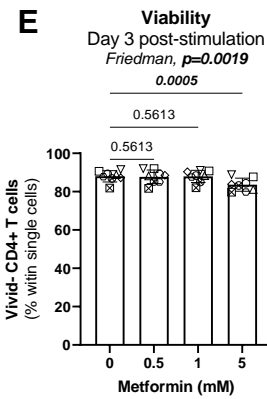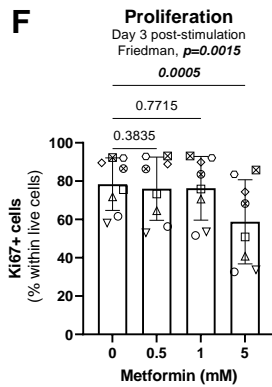

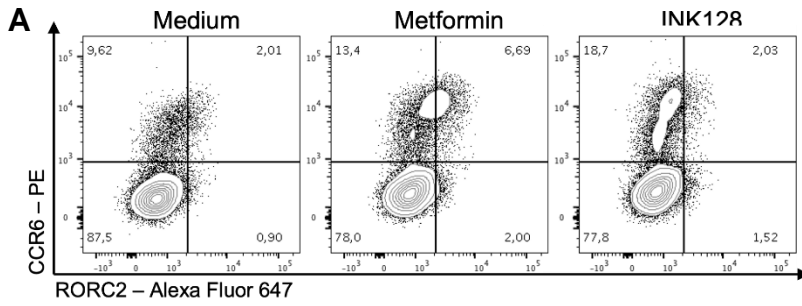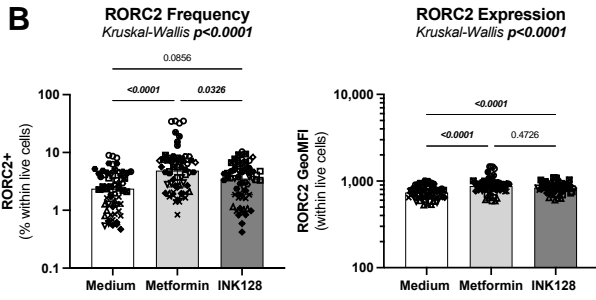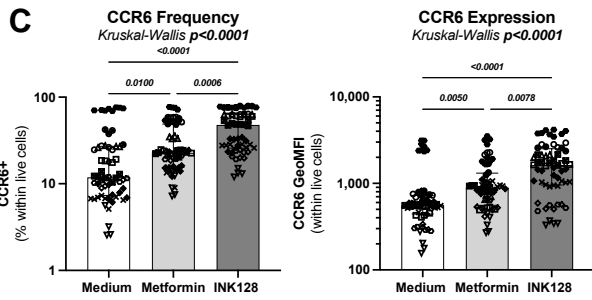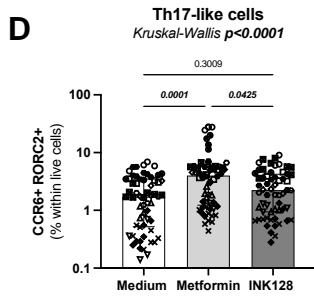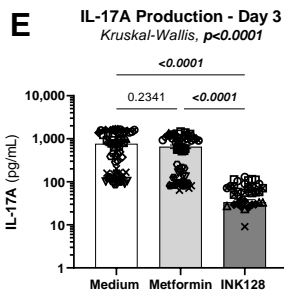

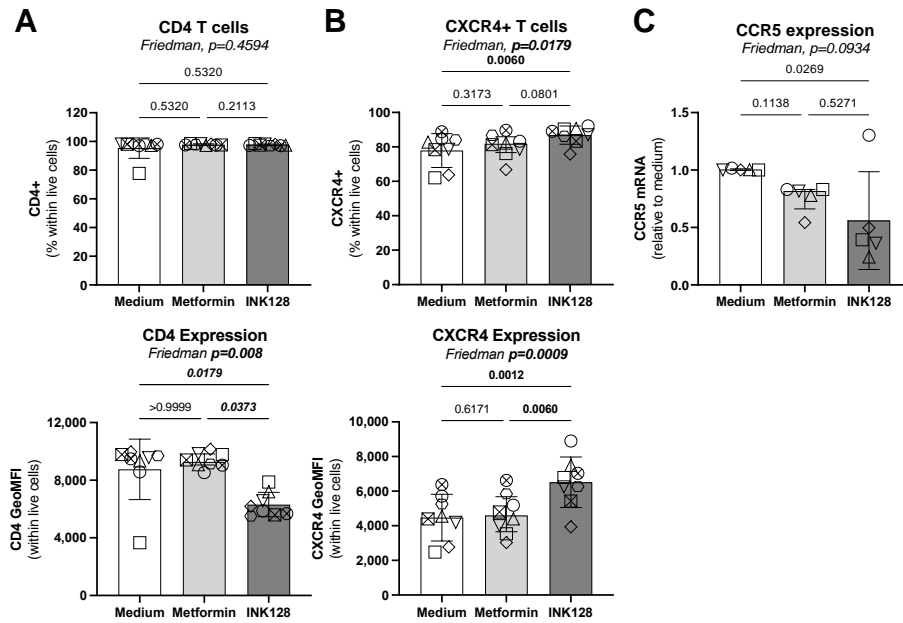

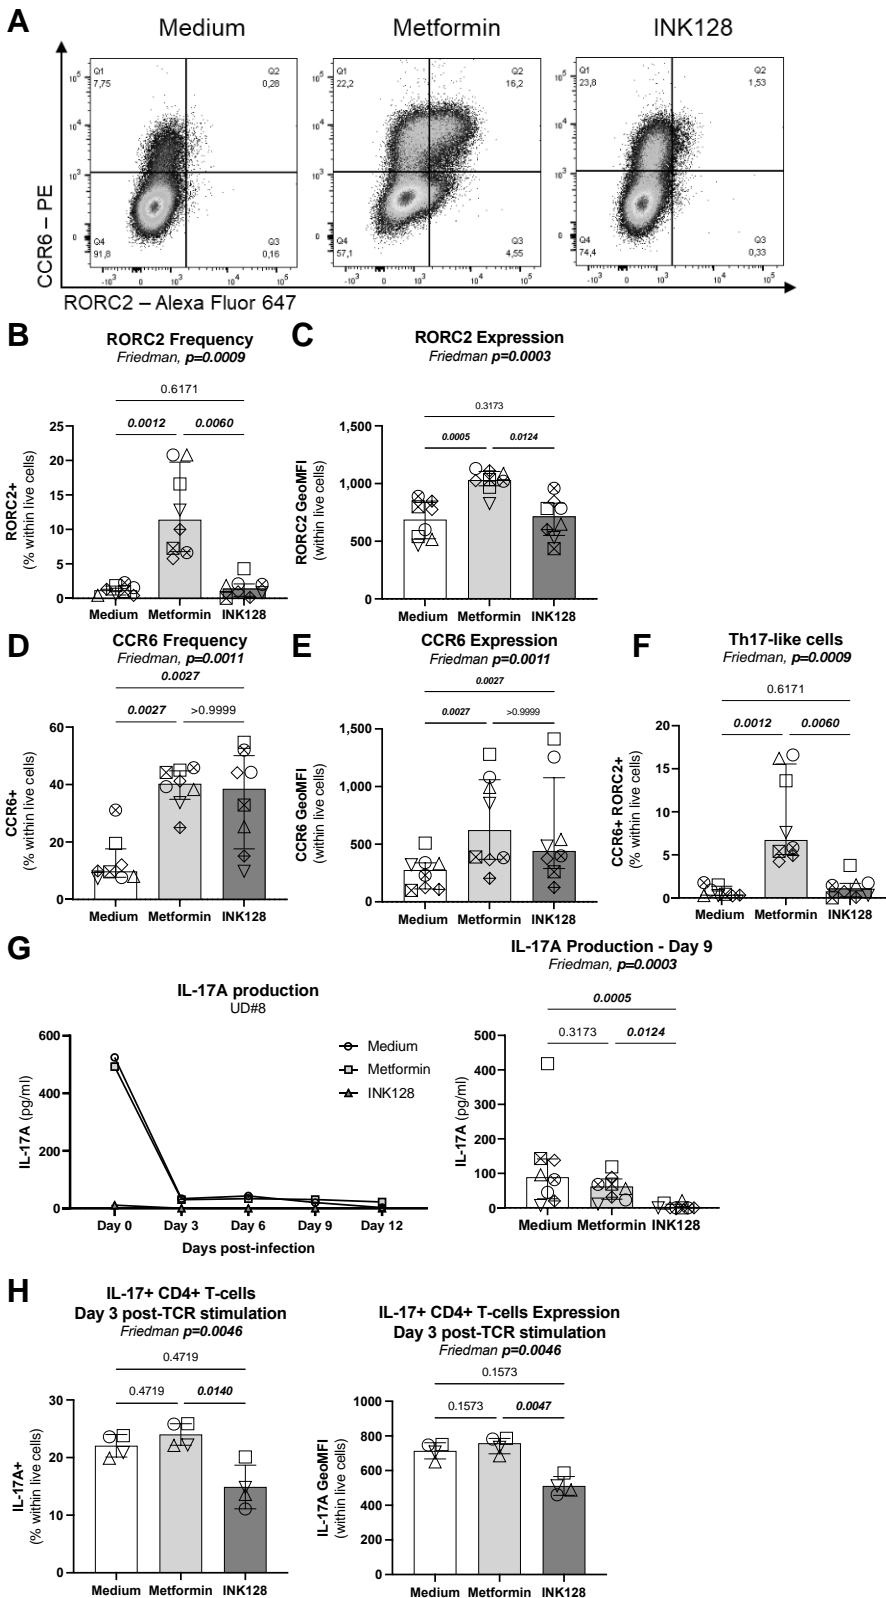

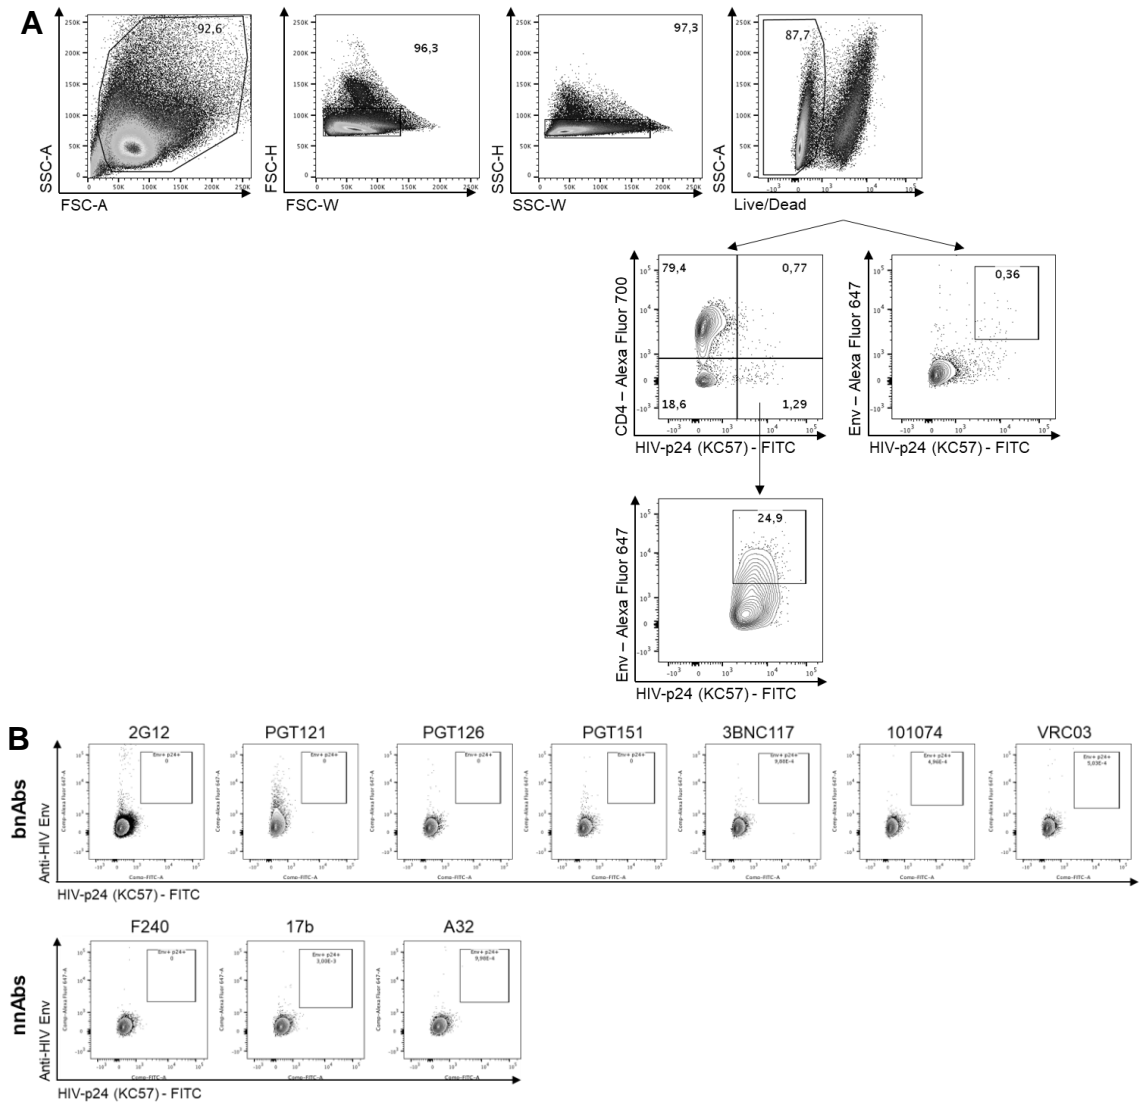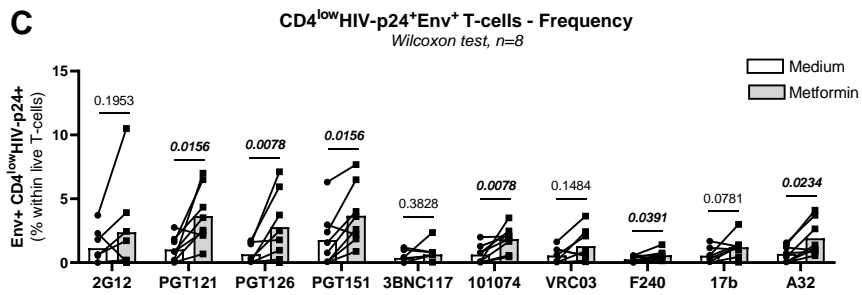

Supplement: media-1.pdf [file media-1.pdf]
